# Supplementary material for: Fabricating penta-coordinated Fe single atoms for electrochemical CO2reduction to syngas
Source: Royal Society of Chemistry journal article supplement (doi:10.1039/d3cy00621b), 2023-01-01
Supplement: d3cy00621b1.pdf [file d3cy00621b1.pdf]

## Electronic Supporting Information (ESI)

# Fabricating penta-coordinated Fe single atom for electrochemical CO<sub>2</sub> reduction to syngas

Linjie Wang,<sup>‡a</sup> Xiaofei Lai,<sup>‡b</sup> Yafeng Xu,<sup>‡c</sup> Shaojuan Luo,<sup>\*a,d,e</sup> Lu Wang,<sup>\*c</sup> Kai Yan,<sup>d</sup> Da Zhang,<sup>a</sup>

Sitong Feng<sup>a</sup> and Yong Xu<sup>\*b</sup>

<sup>a</sup>School of Chemical Engineering and Light Industry, Guangdong University of Technology, Guangzhou 510006, China.

<sup>b</sup>Guangzhou Key Laboratory of Low-Dimensional Materials and Energy Storage Devices, Collaborative Innovation Center of Advanced Energy Materials, School of Materials and Energy, Guangdong University of Technology, Guangzhou 510006, China.

<sup>c</sup>Institute of Functional Nano & Soft Materials (FUNSOM), Jiangsu Key Laboratory for Carbon-Based Functional Materials & Devices, Soochow University, Suzhou, 215123, China.

<sup>d</sup>Guangdong Provincial Key Laboratory of Environmental Pollution Control and Remediation Technology, Sun Yat-Sen University, Guangzhou 510006, China.

<sup>e</sup>Jieyang Branch of Chemistry and Chemical Engineering Guangdong Laboratory, Rongjiang Laboratory, Jieyang, 515200, China.

\*Corresponding author kesjluo@gdut.edu.cn, lwang22@suda.edu.cn, yongxu@gdut.edu.cn

## Computational methods

DFT calculations were performed by the Vienna ab initio simulation package (VASP).<sup>1, 2</sup> The ion-electron interaction was described by the projector augmented wave (PAW) method,<sup>3</sup> while the generalized gradient approach (GGA) of the Perdew-Burke-Ernzerhof (PBE) functional<sup>4, 5</sup> was employed to account for the electron-electron exchange correlation. Furthermore, the van der Waals interaction was also considered in this study by using DFT-D<sub>3</sub> correction.<sup>6</sup> The cutoff energy for the plane wave basis sets was defined as 500 eV. The geometry optimization was converged if the maximum force on each atom reached 0.03 eV Å<sup>-1</sup>. For Fe-N<sub>5</sub>/C and Fe NP/NC structures, a 6×6 supercell of graphene was constructed by missing two adjacent C atoms, and four C atoms in the defective site were replaced by four N atoms. The structures were relaxed using a k-point mesh of 3×3×1 generated by Gamma centered grid. A vacuum space of 15 Å was introduced to avoid the interaction between periodic images. The Gibbs free energy changes ( $\Delta G$ ) were calculated by the following formula (Table S4).<sup>7</sup>

$$\Delta G = \Delta E + \Delta ZPE - T\Delta S$$

where  $\Delta E$  describes the adsorption energy,  $\Delta ZPE$  and  $\Delta S$  are the correction of zero-point energy and entropy for the adsorbed intermediates,  $T$  is the temperature (298.15 K).

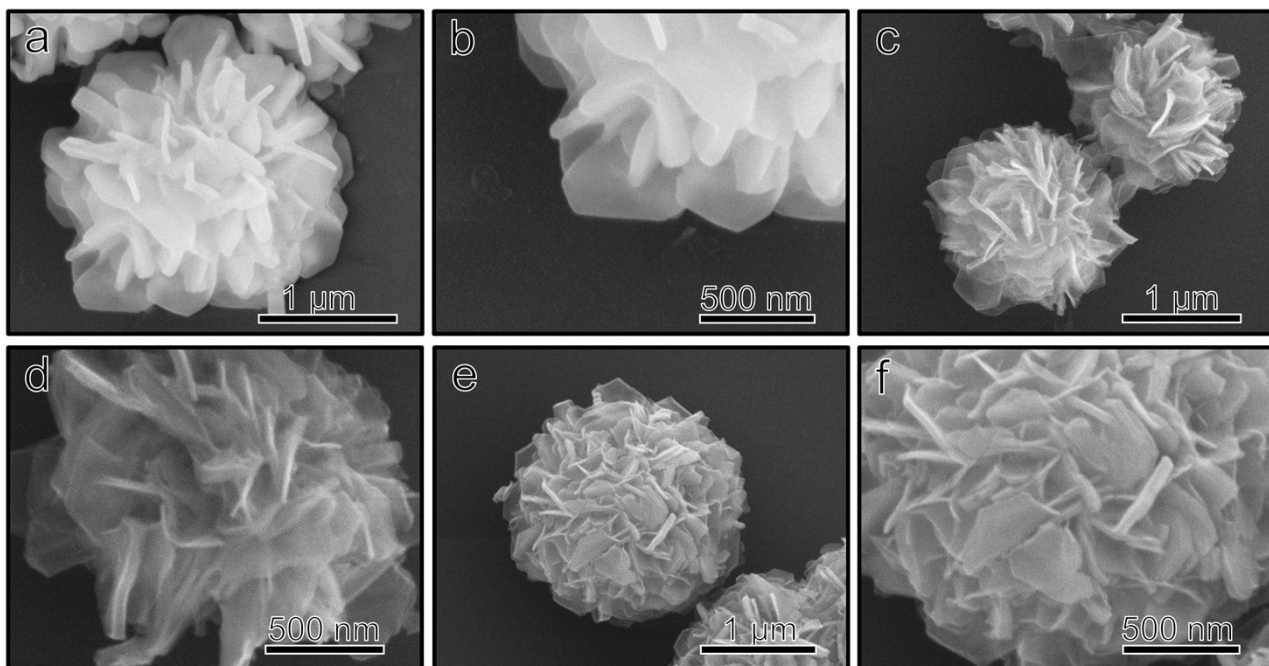

**Figure S1.** SEM images of (a, b) ZTF, (c, d) NC, and (e, f) Fe-N<sub>5</sub>/C.

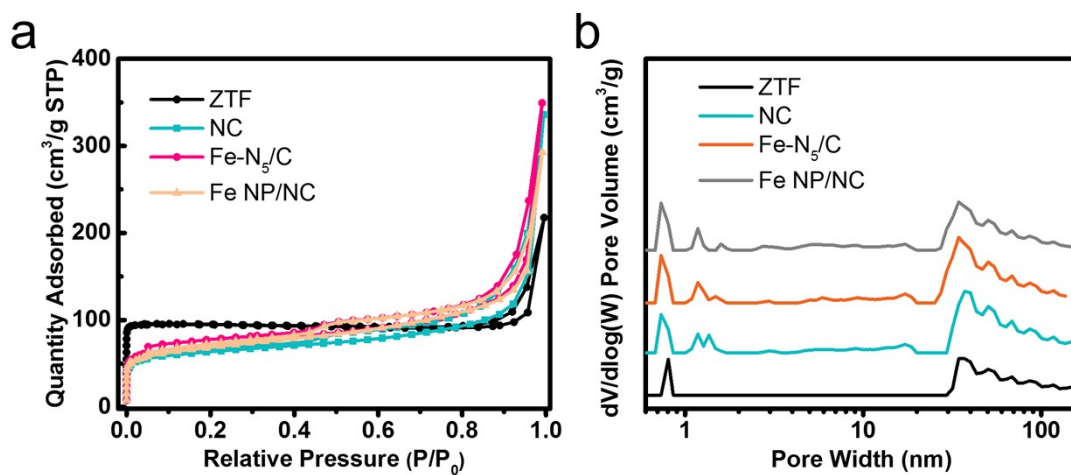

**Figure S2.** (a) N<sub>2</sub> adsorption-desorption isotherms of ZIF, NC, Fe-N<sub>5</sub>/C, and Fe NP/NC; (b) pore structures of ZIF, NC, Fe-N<sub>5</sub>/C, and Fe NP/NC.

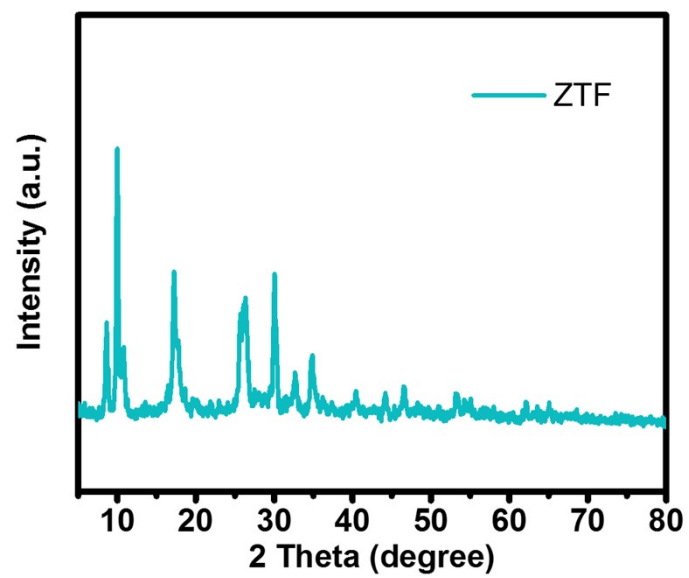

**Figure S3.** XRD pattern of ZTF.

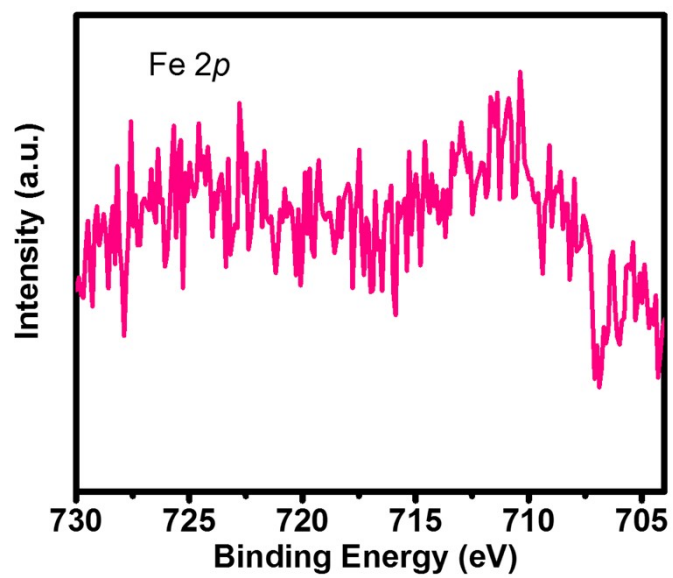

**Figure S4.** High-resolution XPS spectrum of the Fe 2*p* of Fe-N<sub>5</sub>/C.

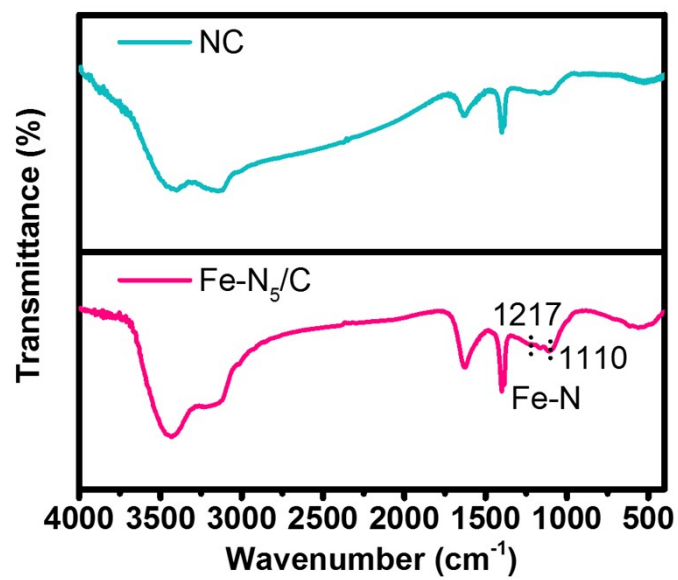

**Figure S5.** FT-IR spectra of NC and Fe-N<sub>5</sub>/C.

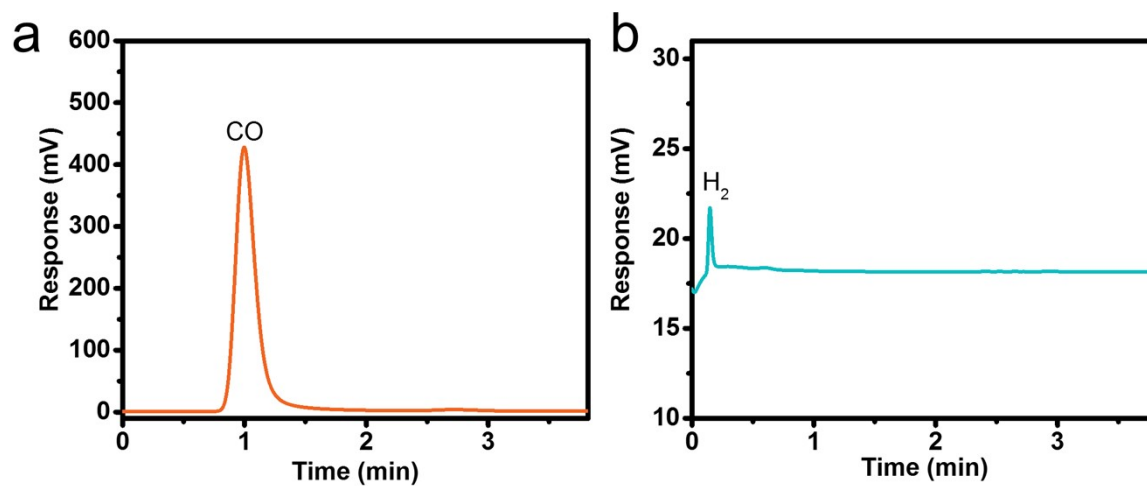

**Figure S6.** Representative spectra of (a) flame ionization detector (FID) and (b) thermal conductivity discharge detector (TCD) taken for the Fe-N<sub>5</sub>/C at -0.7 V.



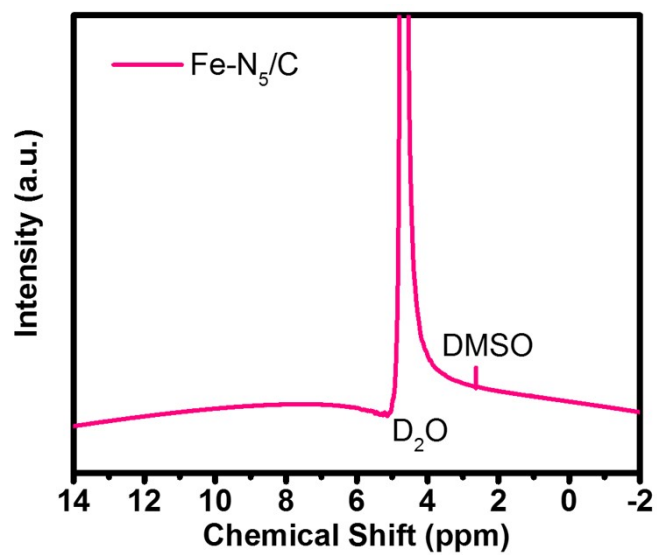

**Figure S7.**  $^1\text{H}$  NMR spectrum of the liquid product obtained over Fe-N<sub>5</sub>/C after 1 h  $\text{CO}_2$  reduction at  $-0.7$  V.

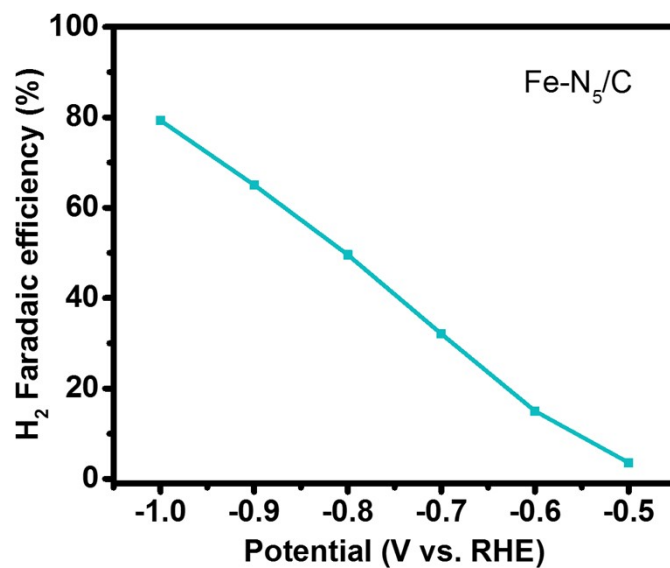

**Figure S8.** Faradic efficiencies of H<sub>2</sub> for the Fe–N<sub>5</sub>/C at various applied potentials.

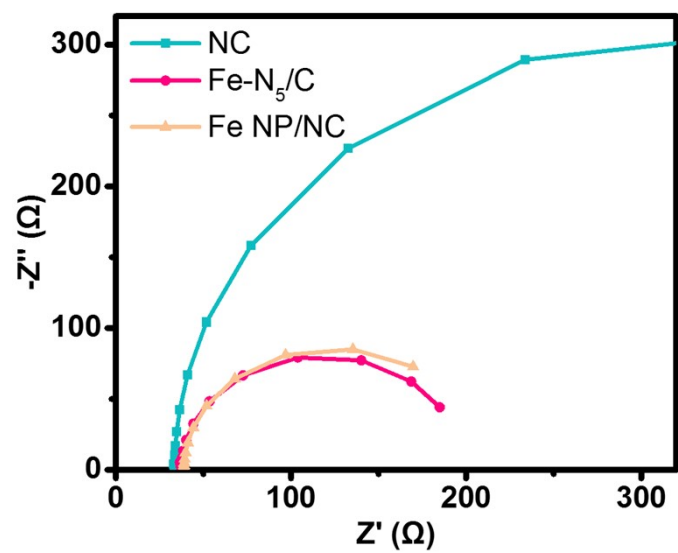

**Figure S9.** EIS Nyquist plots of NC, Fe-N<sub>5</sub>/C, and Fe NP/NC.

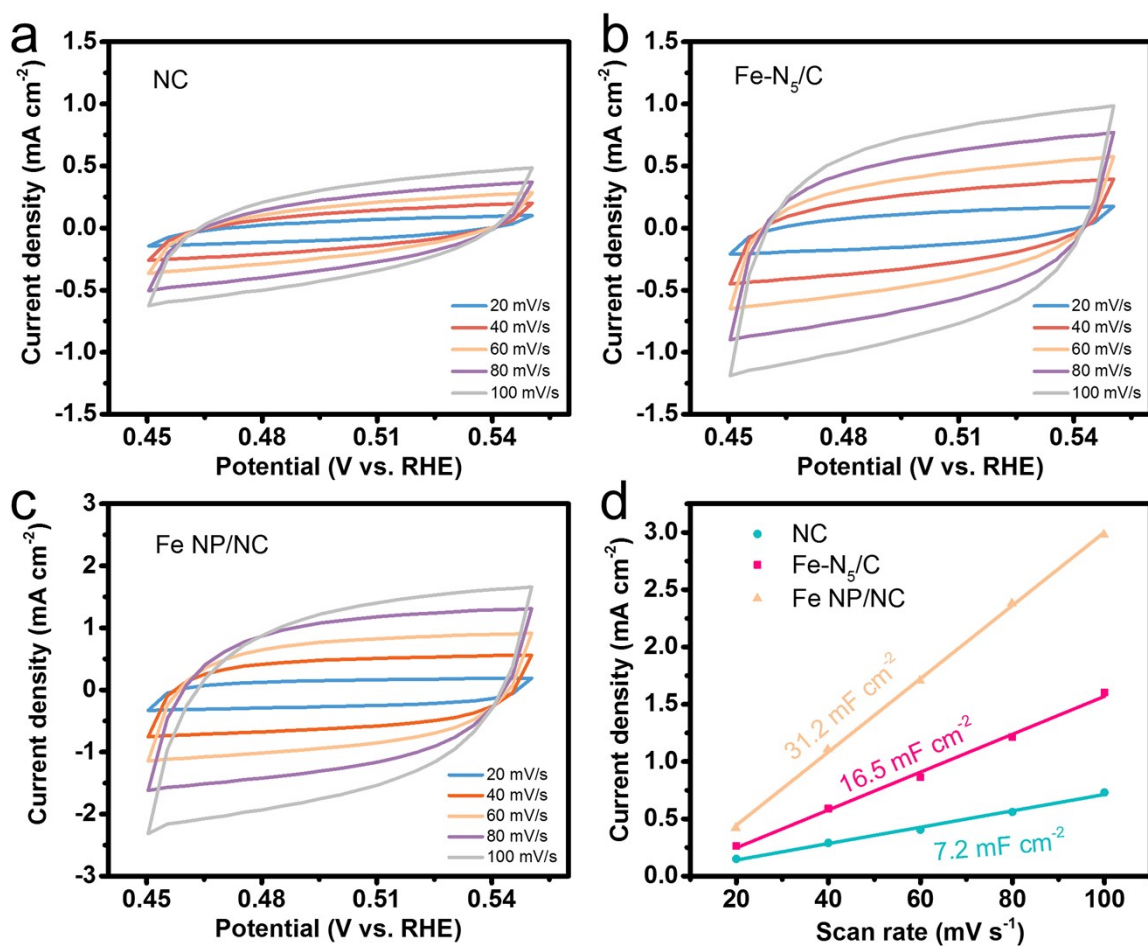

**Figure S10.** Cyclic voltammograms of (a) NC, (b) Fe-N<sub>5</sub>/C, and (c) Fe NP/NC at different scan rates (20, 40, 60, 80, and 100 mV·s<sup>-1</sup>). (d) Double layer capacitive currents plotted against scan rates performed in CO<sub>2</sub>-saturated 1.0 M KOH solution.

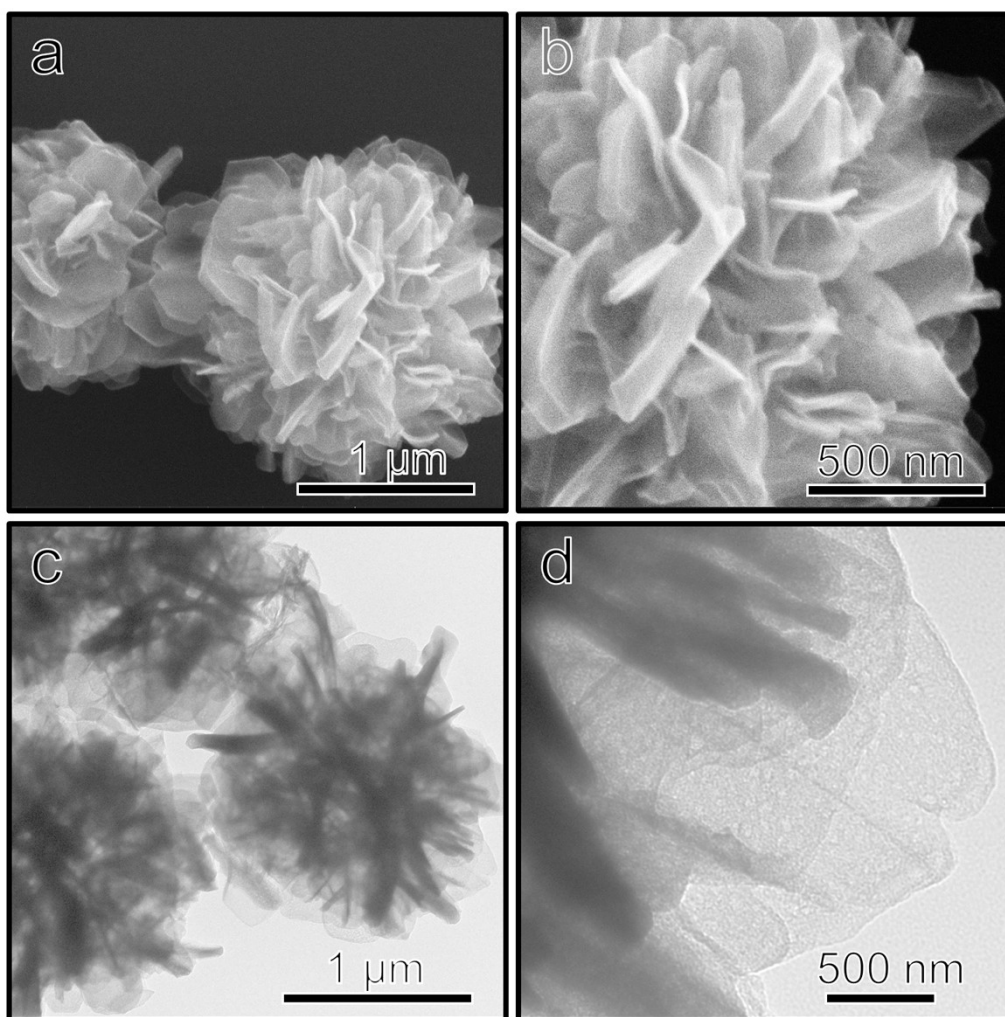

**Figure S11.** (a, b) SEM and (c, d) TEM images of the used Fe-N<sub>5</sub>/C.

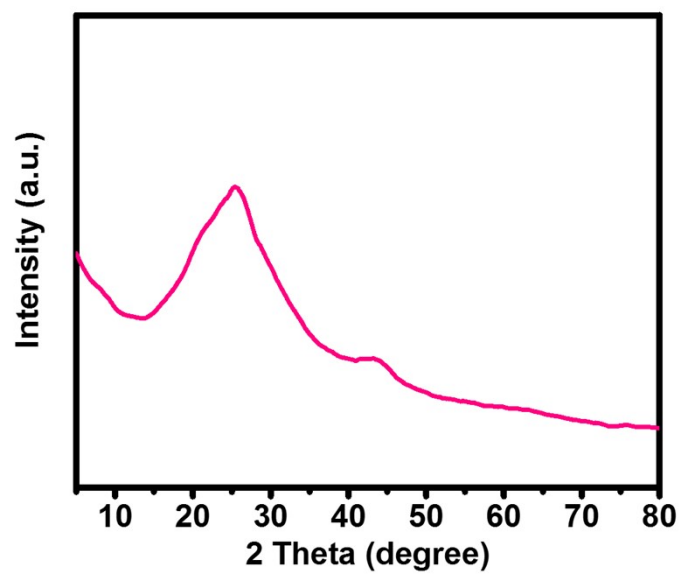

**Figure S12.** XRD pattern of Fe-N<sub>5</sub>/C after 12 h electrolysis.

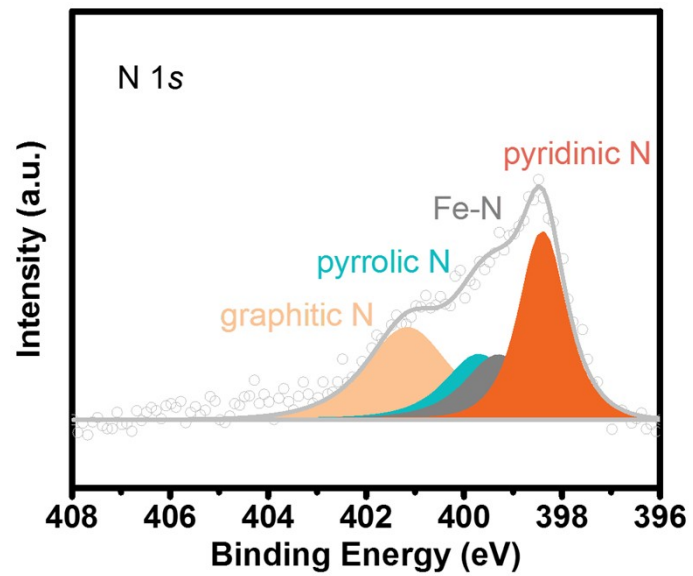

**Figure S13.** N 1s XPS spectra of Fe-N<sub>5</sub>/C after 12 h electrolysis.

**Table S1.** BET analysis results of samples.

| Catalysts            | $S_{\text{BET}}$ (m <sup>2</sup> /g) <sup>a</sup> | $V_{\text{meso}}$ (cm <sup>3</sup> /g) <sup>b</sup> | $V_{\text{micro}}$ (cm <sup>3</sup> /g) <sup>c</sup> |
|----------------------|---------------------------------------------------|-----------------------------------------------------|------------------------------------------------------|
| ZTF                  | 288.2                                             | ~                                                   | 0.145                                                |
| NC                   | 200.8                                             | 0.457                                               | 0.056                                                |
| Fe-N <sub>5</sub> /C | 235.1                                             | 0.464                                               | 0.058                                                |
| Fe NP/NC             | 226.0                                             | 0.391                                               | 0.048                                                |

<sup>a</sup>:  $S_{\text{BET}}$  is BET specific surface area.

<sup>b</sup>:  $V_{\text{meso}}$  is the specific mesopore volume calculated from desorption isotherm by the BJH method.

<sup>c</sup>:  $V_{\text{micro}}$  is the specific micropore volume calculated by the *t*-plot method.



**Table S2.** EXAFS fitting results of Fe–N<sub>5</sub>/C.

| Scattering Paths | CN <sup>[a]</sup> | R (Å) <sup>[b]</sup> | $\sigma^2$ ( $10^{-3}$ Å <sup>2</sup> ) <sup>[c]</sup> | $\Delta E_o$ (eV) <sup>[d]</sup> |
|------------------|-------------------|----------------------|--------------------------------------------------------|----------------------------------|
| Fe–N             | $5.15 \pm 1.21$   | $1.98 \pm 0.1$       | $7.00 \pm 0.01$                                        | $-6.51 \pm 6.06$                 |

<sup>a</sup>: Coordination number.

<sup>b</sup>: Interatomic distance.

<sup>c</sup>: Debye-Waller factor.

<sup>d</sup>: Energy deviation.

**Table S3.** Comparison between Fe–N<sub>5</sub>/C and other reported catalysts for CO<sub>2</sub>RR.

| Catalysts                                              | Electrolyte              | maximum FE <sub>CO</sub> (%) | J <sub>CO</sub> (mA cm <sup>-2</sup> ) | H <sub>2</sub> /CO | Reference |
|--------------------------------------------------------|--------------------------|------------------------------|----------------------------------------|--------------------|-----------|
| Fe–N <sub>5</sub> /C                                   | 0.1 M KHCO <sub>3</sub>  | 67.8                         | 3.8                                    | 0.15/1~2.8/1       | This work |
| Pd/C                                                   | 0.5 M NaHCO <sub>3</sub> | 40                           | 1                                      | 2/1~1/1            | 8         |
| Pd/TaC                                                 | 0.5 M NaHCO <sub>3</sub> | 45                           | 0.5                                    | 6/1~1/1            | 9         |
| Pd/NMs                                                 | 0.5 M KOH                | 48                           | 2.5                                    | 2/1~1/1            | 10        |
| Ag NCs                                                 | 0.1 M KHCO <sub>3</sub>  | 55                           | 2                                      | 2/1~1/1            | 11        |
| Cu nanowire arrays                                     | 0.1 M KHCO <sub>3</sub>  | 40                           | 2                                      | 3/1~1/2            | 12        |
| Cu <sub>ZIF</sub> -T                                   | ~                        | 40                           | 2                                      | 3/1~1/2            | 13        |
| N-doped carbon                                         | 0.1 M KHCO <sub>3</sub>  | 65                           | 2                                      | 3/1~1/2            | 14        |
| CuInO/C                                                | 0.1 M KHCO <sub>3</sub>  | 42                           | ~                                      | ~0.83              | 15        |
| Pd/NbN                                                 | 0.5 M NaHCO <sub>3</sub> | 38.4                         | 0.4                                    | 1.35/1~6.25/1      | 16        |
| CuO-400                                                | 0.1 M KHCO <sub>3</sub>  | 48.2                         | 1.4                                    | 1/1~2/1            | 17        |
| Pd@CuO-2                                               | 0.5 M NaHCO <sub>3</sub> | 58.3                         | 2.2                                    | 0.44/1~0.72/1      | 18        |
| Co@CoNC-900                                            | 0.1 M KHCO <sub>3</sub>  | 42                           | 3.2                                    | 1/1~1.5/1          | 19        |
| CoI-Au                                                 | 0.5 M KHCO <sub>3</sub>  | 35                           | 1                                      | 1.8/1~2.2/1        | 20        |
| F-Cu <sub>2</sub> O                                    | 0.1 M KHCO <sub>3</sub>  | 53.2                         | 0.9                                    | 0.5/1~1/1          | 21        |
| Bulk In                                                | 0.1 M KHCO <sub>3</sub>  | 38                           | 0.2                                    | 0.2/1~1/1          | 22        |
| Cu/In <sub>2</sub> O <sub>3</sub> NPs/C-H <sub>2</sub> | 0.1 M KHCO <sub>3</sub>  | 31.1                         | 2.1                                    | 1.6/1~2/1          | 23        |

**Table S4.** Free energies of molecule species.<sup>a</sup>

| Species              | $E$ (eV) | ZPE (eV) | TS (eV) |
|----------------------|----------|----------|---------|
| H <sub>2</sub> (g)   | -6.77    | 0.27     | 0.41    |
| H <sub>2</sub> O (l) | -14.22   | 0.56     | 0.67    |
| CO (g)               | -15.28   | 0.14     | 0.61    |
| CO <sub>2</sub> (g)  | -22.96   | 0.31     | 0.66    |

<sup>a</sup>: A -0.51 eV correction to energy of CO (g) is included due to the use of PBE functional.

## References

1. G. Kresse and J. Furthmüller, *Comput. Mater. Sci.*, 1996, **6**, 15-50.
2. G. Kresse and J. Furthmüller, *Phys. Rev. B*, 1996, **54**, 11169-11186.
3. P. E. Blöchl, *Phys. Rev. B*, 1994, **50**, 17953-17979.
4. J. P. Perdew, M. Ernzerhof and K. Burke, *J. Chem. Phys.*, 1996, **105**, 9982-9985.
5. J. P. Perdew, K. Burke and M. Ernzerhof, *Phys. Rev. Lett.*, 1996, **77**, 3865-3868.
6. S. Grimme, J. Antony, S. Ehrlich and H. Krieg, *J. Chem. Phys.*, 2010, **132**, 154104-154122.
7. J. K. Nørskov, J. Rossmeisl, A. Logadottir, L. Lindqvist, J. R. Kitchin, T. Bligaard and H. Jonsson, *The Journal of Physical Chemistry B*, 2004, **108**, 17886-17892.
8. W. Sheng, S. Kattel, S. Yao, B. Yan, Z. Liang, C. J. Hawxhurst, Q. Wu and J. G. Chen, *Energy Environ. Sci.*, 2017, **10**, 1180-1185.
9. J. Wang, S. Kattel, C. J. Hawxhurst, J. H. Lee, B. M. Tackett, K. Chang, N. Rui, C. J. Liu and J. G. Chen, *Angew. Chem. Int. Ed.*, 2019, **58**, 6271-6275.
10. J. Wu, Y. Xie, Z. Ren, S. Du, H. Meng, L. Zhao, X. Wang, G. Wang and H. Fu, *ChemSusChem*, 2019, **12**, 3304-3311.
11. X. Han, L. Liu, J. Yuan, X. Zhang and D. Niu, *ChemSusChem*, 2021, **14**, 721-729.
12. R. Daiyan, R. Chen, P. Kumar, N. M. Bedford, J. Qu, J. M. Cairney, X. Lu and R. Amal, *ACS Appl. Mater. Interfaces*, 2020, **12**, 9307-9315.
13. S. Cui, C. Yu, X. Tan, H. Huang, X. Yao and J. Qiu, *ACS Sustain. Chem. Eng.*, 2020, **8**, 3328-3335.
14. H. Li, N. Xiao, Y. Wang, C. Li, X. Ye, Z. Guo, X. Pan, C. Liu, J. Bai and J. Xiao, *J. Mater. Chem. A*, 2019, **7**, 18852-18860.
15. C. Shen, P. Wang, L. Li, X. Huang and Q. Shao, *Nano Res.*, 2022, **15**, 528-534.
16. Y. Liu, D. Tian, A. N. Biswas, Z. Xie, S. Hwang, J. H. Lee, H. Meng and J. G. Chen, *Angew. Chem. Int. Ed.*, 2020, **59**, 11345-11348.
17. X. Yao, Y. Guo, B. Liu, P. Wang, J. Sun, W. Li and C. Zhao, *ChemElectroChem*, 2021, **8**, 592-602.
18. R. Cai, X. Du, G. Liu, X. Wang, Q. Tang, X. Pan, F. Li and J. Li, *Fuel*, 2023, **338**, 127346-127353.

19. Y. Wang, C. Niu, Y. Zhu, D. He and W. Huang, *ACS Appl. Energ. Mater.*, 2020, **3**, 9841-9847.
20. L. Mascaretti, A. Niorettini, B. R. Bricchi, M. Ghidelli, A. Naldoni, S. Caramori, A. Li Bassi and S. Berardi, *ACS Appl. Energ. Mater.*, 2020, **3**, 4658-4668.
21. H. Luo, B. Li, J. G. Ma and P. Cheng, *Angew. Chem. Int. Ed.*, 2022, **134**, e202116736.
22. S. A. Mahyoub, F. A. Qaraah, S. Yan, A. Hezam, C. Chen, J. Zhong and Z. Cheng, *J. CO2 Util.*, 2022, **61**, 102033-102044.
23. J. Shen, L. Wang, X. He, S. Wang, J. Chen, J. Wang and H. Jin, *ChemSusChem*, 2022, **15**, e202201350.
